# Regulation of primordial follicle assembly and development

Michael K. Skinner

Center for Reproductive Biology, School of Molecular Biosciences, Washington State University, Pullman, WA, USA

To whom correspondence should be addressed at: Center for Reproductive Biology, School of Molecular Biosciences, Washington State University, Pullman, WA 99164-4231, USA. E-mail: Skinner@mail.wsu.edu

**The assembly of the primordial follicles early in ovarian development and the subsequent development and transition of the primordial follicle to the primary follicle are critical processes in ovarian biology. These processes directly affect the number of oocytes available to a female throughout her reproductive life. Once the pool of primordial follicles is depleted a series of physiological changes known as menopause occur. The inappropriate coordination of these processes contributes to ovarian pathologies such as premature ovarian failure (POF) and infertility. Primordial follicle assembly and development are coordinated by locally produced paracrine and autocrine growth factors. Endocrine factors such as progesterone have also been identified that influence follicular assembly. Locally produced factors that promote the primordial to primary follicle transition include growth factors such as kit ligand (KL), leukaemia inhibitory factor (LIF), bone morphogenic proteins (BMP's), keratinocyte growth factor (KGF) and basic fibroblast growth factor (bFGF). Factors mediating both precursor theca–granulosa cell interactions and granulosa–oocyte interactions have been identified. A factor produced by preantral and antral follicles, Müllerian inhibitory substance, can act to inhibit the primordial to primary follicle transition. Observations suggest that a complex network of cell–cell interactions is required to control the primordial to primary follicle transition. Elucidation of the molecular and cellular control of primordial follicle assembly and the primordial to primary follicle transition provides therapeutic targets to regulate ovarian function and treat ovarian disease.**

*Key words:* granulosa/growth factors/ovary/primordial follicle/theca

## Introduction

Primordial follicle assembly and development is a critical aspect of female reproduction, but a poorly understood process on a mechanistic level. The assembly of primordial follicles that occurs in the later stages of fetal development for a human and in the early postnatal period for the rodent is a distinct process from the induction of primordial follicle development involving the primordial to primary follicle transition. In mammals, the majority of literature suggests that the pool of primordial follicles a female is born with is the cohort of follicles that will develop throughout the female's reproductive life span. Abnormalities in primordial follicle development lead to a number of pathophysiological [e.g. premature ovarian failure (POF)] and female infertility. The current manuscript reviews the molecular and cellular control of primordial follicle development. Several different cell types (e.g. oocyte, granulosa and precursor theca) participate in primordial follicle development. The focus of this review is on the cell–cell interactions and factors involved that control primordial follicle assembly and development.

The terms used in the current review are defined as described below. Primordial follicle development refers to both the assembly process and primordial to primary follicle transition process. Nests

of germ cells (i.e. oogonia) develop in the embryonic period and have been also referred to as clusters or cysts. Owing to the space/fluid filled reference to cysts in the ovary, nests are more accurate and will be used in the current review. The assembly of primordial follicles, also referred to as primordial follicle formation, requires a transition from nests to primordial follicles. The follicle does not exist until the primordial follicle assembles. The primordial follicle pool is generally in a resting state and not developing. The subsequent development of the primordial follicle involves the primordial to primary follicle transition. This is the most accurate reference to this aspect of primordial follicle development. The term follicle growth is misleading for the primordial follicles do not proliferate or undergo mitosis, which is the general reference to the term growth. Although the oocyte does increase in size (i.e. grow), the term follicle growth will not be used so as to not suggest proliferation. Follicle activation is not precise and could refer to expression of a specific gene or cell growth. Therefore, the terms nests, primordial follicle assembly, primordial to primary follicle transition and for more global reference 'primordial follicle development' will be used.

The ability of somatic cells in the gonad to control and maintain the process of gametogenesis is an essential requirement for reproduction. The basic functional unit in the ovary is the ovarian follicle

that is composed of somatic cells and the developing oocyte. The two primary somatic cell types in the ovarian follicle are the theca cells and granulosa cells. These two somatic cell types are the site of action and synthesis of a number of hormones that promote a complex regulation of follicular development. The proliferation of these two cell types is in part responsible for the development of the antral ovarian follicle. The elucidation of factors that control ovarian somatic cell growth and development is critical to understand ovarian physiology.

Granulosa cells are the primary cell type in the ovary that provide the physical support and microenvironment required for the developing oocyte. Granulosa cells are an actively differentiating cell with several distinct populations. Alteration in cellular differentiation is required during folliculogenesis from a primordial stage of development through ovulation to a luteal stage of development. Regulation of granulosa cell cytodifferentiation requires the actions of a number of hormones and growth factors. Specific receptors have been demonstrated on granulosa cells for the gonadotropins FSH and LH (Richards and Midgley, 1976). In addition, receptors have been found for factors such as epidermal growth factor (EGF) (Vlodavsky *et al.*, 1978; Wandji *et al.*, 1992), insulin-like growth factor (IGF) (Adashi, 1998) and inhibiting substance [i.e. anti-Müllerian hormone (AMH)] (Peng *et al.*, 1996). The actions of these hormones and growth factors on granulosa cells vary with the functional marker being examined and the stage of differentiation. The biosynthesis of two important ovarian steroids, estradiol ( $E_2$ ) and progesterone, is a primary function of the granulosa cells in species such as the cow, human and rodent. As the follicle develops, granulosa cells differentiate and estrogen biosynthesis increases. FSH promotes this follicular development via the actions of cAMP. As the follicle reaches the developmental stages before ovulation, the granulosa cells develop an increased capacity to synthesize and secrete progestins under the control of LH. In contrast to secondary, preantral and antral follicles, the early primordial follicle stage granulosa are gonadotropin and steroid hormone independent and are non-steroidogenic (Richards and Midgley, 1976; Oktay *et al.*, 1997).

Another important cell type in the ovary is the ovarian theca cell. These are differentiated stromal cells that surround the follicle and have also been termed theca interstitial cells (Erickson, 1983). The inner layer of cells, the theca interna, has a basement membrane separating it from the outermost layer of mural granulosa cells. One of the major functions of theca cells in species such as the cow, human and rodent is the secretion of androgens (Fortune and Armstrong, 1977). Theca cells respond to LH by increasing the production of androgens from cholesterol (Erickson and Ryan, 1976). Theca cells also produce progestins under gonadotropin control (McNatty *et al.*, 1979; Channing, 1980; Evans *et al.*, 1981; Haney and Schomberg, 1981; Braw-Tal and Roth, 2005). At the primordial stage, no theca cells are present; however, during transition to the primary stage, theca cells (i.e. precursor non-steroidogenic cells) are recruited to the follicle. Theca cell association with the developing primordial follicles is critical in most mammalian species, including the human.

During embryonic development, oogonia proliferate and do not consistently associate with somatic cells (Pepling and Spradling, 2001). Later in fetal development in the human and cow or early postnatally in the rodent, primordial follicles assemble. Primordial follicles consist of a single oocyte and generally an incomplete layer of squamous (i.e. flattened) pre-granulosa cells (Figure 1). These primordial follicles exist in a stromal-interstitial cell environment with no apparent theca cell layers or organized mesenchymal tissue surrounding the follicles (Rajah *et al.*, 1992). Females are

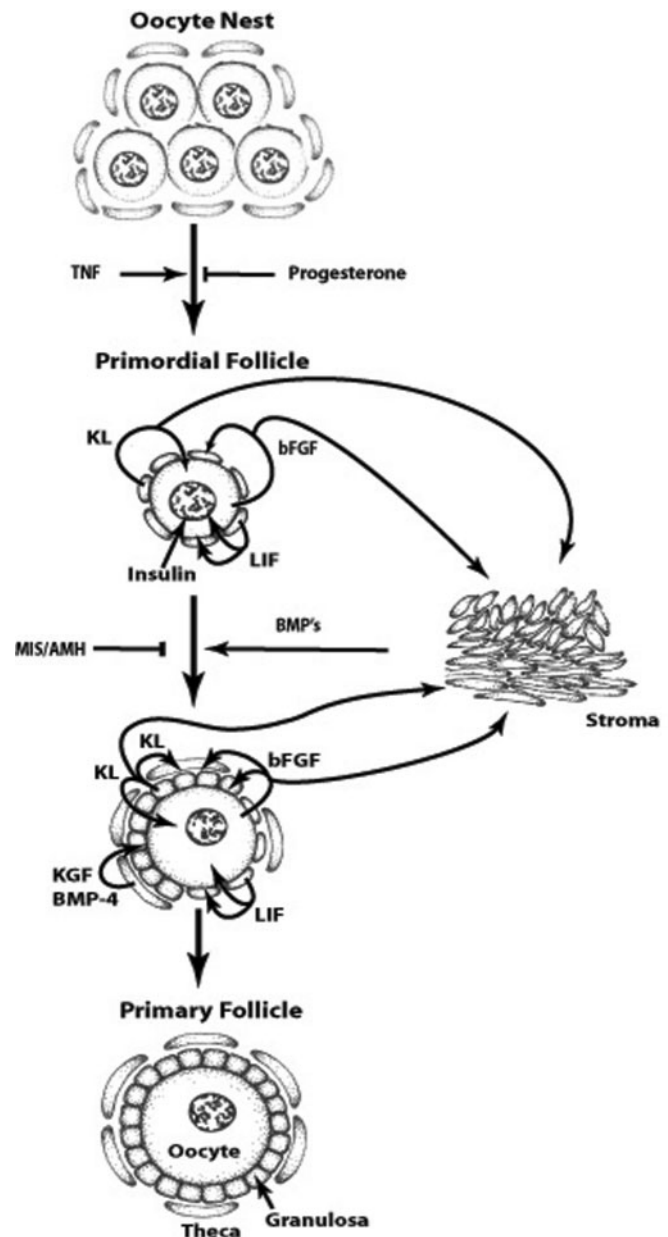

**Figure 1.** Schematic of the proposed cellular interactions in primordial follicle development. The follicle structures involving the oocyte, granulosa and theca cells are shown. Cell-cell interactions are mediated by tumour necrosis factor alpha (TNF $\alpha$ ), kit ligand (KL), basic fibroblast growth factor (bFGF), leukemia inhibitory factor (LIF), bone morphogenetic protein-4 (BMP-4), keratinocyte growth factor (KGF), insulin and Müllerian inhibitory substance (MIS).

born with a pool of primordial follicles or oocytes. Literature suggests this pool represents the complete supply of oocytes that may potentially develop and ovulate. After primordial follicle development is initiated, the follicles are destined to ovulate or degenerate through atresia. When the supply of oocytes (i.e. primordial follicles) is diminished, menstrual cyclicity ends and humans undergo menopause.

A recent report suggested the potential presence of a female germ-line stem cell population in the ovarian surface epithelium covering the surface of the ovary (Johnson *et al.*, 2004). This intriguing observation leads to the speculation that this stem cell population may provide a continual supply of primordial follicles, such that the primordial follicle pool may not be finite and regenerate. In contrast, the majority of literature in most mammalian species and a large number of transgenic mouse models have demonstrated the lack of a regenerative pool of primordial follicles (Foxcroft and Hunter, 1985; Adashi, 1994; Lass, 2001; Schlessinger and Van Zant, 2001; Durlinger *et al.*, 2002; Fortune, 2003; van Zonneveld *et al.*, 2003; Mayer *et al.*, 2004; Rajkovic *et al.*, 2004). No previous study has demonstrated the presence of a replenishing or regenerative pool of follicles (Guigon *et al.*, 2003; Shirota *et al.*, 2003), other than some shown in fish or bird models. The interesting potential presence of an adult female germ-line stem cell (Johnson *et al.*, 2004) requires further studies to confirm the presence of this cell and its ability to contribute to the primordial follicle pool. Independent of the absence or presence of this potential stem cell population, the basic mechanisms involved in primordial follicle assembly and development will be functioning.

The majority of primordial follicles exist in a quiescent state with the oocyte arrested in prophase I of meiosis. In sexually mature animals, follicles leave the arrested pool and undergo the primordial to primary follicle transition (Faddy and Gosden, 1995, 1996; McGee and Hsueh, 2000; Fortune, 2003). One of the initial events in primordial follicle development (i.e. primordial to primary transition) is a change in granulosa cells from a squamous to cuboidal morphology (Lintern-Moore and Moore, 1979). The developing primordial follicles transition to primary follicles results in an oocyte with an increased diameter and a single layer of cuboidal granulosa cells (Lintern-Moore and Moore, 1979; Hirshfield, 1991; Rajah *et al.*, 1992; Fortune, 1994, 2003) (Figure 1). Another early event in the process of folliculogenesis is the recruitment of theca cells from the stromal-interstitial cell population, and subsequent proliferation of both granulosa and theca cells. Factors produced by the granulosa cells that may be involved in theca cell recruitment and subsequent theca cell proliferation are reviewed below. A morphologically distinct theca cell in the early stage follicles has been reported in the rat, but is less defined in other models (Hirshfield, 1991). Epithelial cells do not develop or differentiate in the absence of an adjacent mesenchymal cell (Grobstein, 1967; Kratochwil, 1972). Therefore, the stromal/mesenchymal cells that associate with the primordial follicle in transition to the primary follicle are likely early stage precursor theca cells. Although both the granulosa and theca populations at this stage of development are not gonadotropin hormone responsive or steroidogenic, they are the less differentiated precursor populations of these cells. Because of the evolutionary conservation of this process in mammals it is proposed that this process of precursor theca cell recruitment and requirement for primordial follicle development is needed for all mammals, including human,

independent of whether there is a morphologically distinct population of cells.

The initiation of primordial to primary follicle transition has been shown to be stimulated when ovarian tissue is cultured *in vitro* (Wandji *et al.*, 1996; Hovatta *et al.*, 1999; Parrott and Skinner, 1999, 2000; Nilsson *et al.*, 2001, 2002; Durlinger *et al.*, 2002; Kezele *et al.*, 2002, 2005; Nilsson and Skinner, 2002, 2003, 2004; Kezele and Skinner, 2003;). This has been shown in several different species with a variety of procedures (Fortune *et al.*, 1998; Hovatta *et al.*, 1999; Miller *et al.*, 1999; Faddy, 2000; Meredith *et al.*, 2000; Oktay *et al.*, 2000; Campbell *et al.*, 2004; Silva *et al.*, 2004). Primordial follicle development is hormone independent (Balla *et al.*, 2003; Campbell *et al.*, 2004; Silva *et al.*, 2004; Braw-Tal and Roth, 2005), but the lack of developing follicles can influence primordial follicles (Balla *et al.*, 2003; Fortune, 2003). The culture of primordial follicles has recently been proposed as a source of viable oocytes for assisted reproductive technologies (Hovatta, 2000; Picton and Gosden, 2000; Cortvrindt and Smitz, 2001; Liu *et al.*, 2001). These cultures have also provided insight into the factors that regulate primordial follicle development (Murray and Spears, 2000; Picton and Gosden, 2000; Telfer *et al.*, 2000; Campbell *et al.*, 2004; Silva *et al.*, 2004). Ovary cultures have been used to assess the importance of vascularization (Fortune *et al.*, 2000), apoptosis (Reynaud and Driancourt, 2000; Flaws *et al.*, 2001) and growth factors (De Felici, 2000; Derrar *et al.*, 2000; Gougeon and Busso, 2000; Erickson, 2001; Nilsson and Skinner, 2001) to primordial follicle development (O'Brien *et al.*, 2003). A number of these factors are discussed below with a focus on the factors shown to influence primordial to primary follicle transition. The actions of these factors on primordial follicles will be compared to their actions on primordial follicle assembly and later stage follicle development. This information is relevant to several physiological conditions including aspects of POF (Gosden and Faddy, 1998) and oocyte protection from radiotherapy and chemotherapy (Meirow and Nugent, 2001; Bath *et al.*, 2003).

### Primordial follicle assembly

The assembly or formation of the primordial follicles requires individual oocytes to segregate and associate with squamous (i.e. precursor) granulosa cells. Nests of associated oocytes undergo random apoptosis of individual oocytes to derive isolated oocytes that then associate with precursor squamous granulosa cells (Pepling and Spradling, 1998, 2001; Pepling *et al.*, 1999; McNatty *et al.*, 2000; Depalo *et al.*, 2003; Vaskivuo and Tapanainen, 2003) (Figure 1). The factors controlling this primordial follicle assembly have not been thoroughly investigated (Lunenfeld *et al.*, 1975), but neurotrophins have been implicated (Dissen *et al.*, 2001; Matzuk, 2001). The culture of 0-day rat ovaries has been utilized to investigate this follicle assembly. It was found that the total number of follicles/oocytes did not change in the cultures with different treatments (Kezele and Skinner, 2003). Therefore, the apoptosis rate as judged by TdT (terminal deoxynucleotidyl transferase)-mediated dUDP nick-end labelling (TUNEL) analysis did not change (Kezele and Skinner, 2003). This is an important criterion to examine to allow data interpretation of changes in follicle development versus survival. It is anticipated that different cell-cell interactions and factors will be involved in the assembly of

primordial follicles compared to those of the primordial to primary follicle transition.

An interesting observation from the *in vitro* culture of 0-day-old rat ovaries (Kezele and Skinner, 2003) was that the majority of primordial follicles that assembled continued to develop spontaneously into primary follicles. This is in contrast to 4-day-old rat ovary cultures that require an external stimulus [e.g. the kit ligand (KL)] to induce this degree of primordial to primary follicle transition (Parrott and Skinner, 1999). Therefore, primordial follicle assembly occurs *in vitro*; however, subsequent primordial to primary follicle transition dramatically increases compared to *in vivo* ovaries (Kezele and Skinner, 2003), or 4-day-old ovary cultures. An inhibitory mechanism appears to be established *in vivo* that was not established in the 0-day-old ovary cultures that allowed spontaneous primordial follicle development. To investigate what factors may influence or inhibit this development, the cultures were treated with several agents (Kezele and Skinner, 2003). Both estrogen at a 10<sup>-6</sup> M concentration and progesterone at a 10<sup>-6</sup> M concentration dramatically inhibited the primordial to primary follicle development (Kezele and Skinner, 2003). A preliminary experiment with KL showed no effect on primordial follicle development in the cultures from 0-day ovaries. Primordial follicle assembly was inhibited by progesterone to a greater degree than estrogen, but both steroids inhibited the assembly process (Kezele and Skinner, 2003). The effect of steroid hormones on the 0-day-old ovary cultures was unexpected and suggests that an alteration in ovarian steroid levels may be a factor in the control of primordial follicle assembly. A decline in ovarian steroid levels initially derived from maternal/placental sources may influence primordial follicle assembly. Previously, in the rodent it has been shown that primordial follicle assembly occurs by approximately day 2 and 3 postnatally. The serum concentrations of E<sub>2</sub> drop between day 0 and day 2 from 155 pg/mL to 5.6 pg/mL (Montano *et al.*, 1995). In the cow embryonic ovary, steroid levels also drop dramatically at the later stage of fetal development, which coincides with primordial follicle assembly (Tanaka *et al.*, 2001). Estrogen levels appear to regulate fetal ovarian maturation in the primate (Zachos *et al.*, 2002). The previous studies have lead to the hypothesis that ‘high levels of ovarian steroid hormones prevent primordial follicle assembly and that a decline in ovarian steroid levels in part initiates primordial follicle assembly through locally produced growth factors’ (Kezele and Skinner, 2003) (Figure 1 and Table I).

This previous study also demonstrated that the ability of progesterone to inhibit the assembly of primordial follicles is in part

mediated through a reduction in oocyte apoptosis (Kezele and Skinner, 2003). Previously it has been shown that oocytes exist unassembled in nests and that apoptosis of surrounding oocytes causes isolated oocytes to develop and assemble with precursor granulosa cells to form primordial follicles (McNatty *et al.*, 2000). When the 0-day ovary cultures are incubated with progesterone, the apoptosis is inhibited and individual follicles do not form (Kezele and Skinner, 2003). The apoptosis of random oocytes in the oocyte nests is required for primordial follicle assembly (McNatty *et al.*, 2000; Hussein, 2005) and tumour necrosis factor-alpha (TNFα) appears to be involved in this process (Marcinkiewicz *et al.*, 2002). TNFα appears to promote this random oocyte apoptosis to allow primordial follicle assembly. The ability of progesterone to prevent apoptosis is speculated to be linked to a suppression of TNFα expression in the oocyte (Figure 1). Observations provide some of the first insights into primordial follicle assembly and require further investigation of the relationship of steroid hormone actions, local growth factors, oocyte apoptosis and follicle assembly.

A recent study utilized a micro-array analysis to investigate the changes in gene expression between unassembled oocytes, primordial follicles and primary follicles to correlate this with the growth factor mediated cell–cell interactions of interest (Kezele *et al.*, 2005). The developmental time points compared were the 0-day ovary that is predominately unassembled oocytes, the day 4 freshly isolated ovary that is predominately primordial follicles and cultured 0-day ovary that is predominately primary follicles (Kezele and Skinner, 2003). The ovarian transcriptomes of these developmental stages were compared. An Affymetrix micro-array analysis was utilized to investigate the simultaneous expression of all the genes of interest [e.g. KL, basic fibroblast growth factor (bFGF), leukaemia inhibitory factor (LIF), keratinocyte growth factor (KGF) and bone morphogenic protein-4 (BMP-4)]. The micro-array data were compared between the developmental periods and follicle populations with a focus on the genes related to the growth factor and hormone actions of interest (Kezele *et al.*, 2005). The micro-array data demonstrated a decline in KL, negligible change in bFGF and KGF, and an increase in LIF. Several control genes such as inhibin, 3 beta-hydroxysteroid dehydrogenase and Zona Pellucida 2 that were expected to increase were found to increase as the primordial follicle assembled. New growth factors were identified for further analysis in the regulation of primordial follicle assembly and development (Kezele *et al.*, 2005). A similar analysis with a mouse micro-array has also identified potentially important genes for primordial follicle formation (Herrera *et al.*, 2005). A human primordial follicle complementary DNA library has recently been generated as a resource to investigate human primordial follicle development (Serafica *et al.*, 2005). Therefore, genomic procedures are being utilized to help elucidate this critical aspect of primordial follicle development.

Primordial to primary follicle transition

Previous observations have demonstrated that theca cells produce transforming growth factor (TGF) α, KGF and hepatocyte growth factor (HGF) that can regulate granulosa cells, whereas granulosa cells produce KL that can influence theca cells and the oocyte. More recently, studies have demonstrated that KL, bFGF, LIF, KGF and BMP-4 can influence primordial follicle development

Table I. Primordial follicle development regulatory factors

| Regulatory factor              | Cellular source | Cellular site of action  |
|--------------------------------|-----------------|--------------------------|
| Tumour necrosis factor-alpha   | Oocyte          | Oocyte                   |
| Basic fibroblast growth factor | Oocyte          | Granulosa, theca, stroma |
| Kit ligand                     | Granulosa       | Oocyte, theca, stroma    |
| Leukaemia inhibitory factor    | Granulosa       | Oocyte, granulosa        |
| Keratinocyte growth factor     | Theca           | Granulosa                |
| Bone morphogenic protien-4     | Theca/stroma    | Granulosa                |
| Bone morphogenic protein-7     | Stroma          | Granulosa                |
| Insulin                        | Endocrine       | Oocyte                   |
| Progesterone                   | Endocrine       | Oocyte                   |
| Müllerian inhibitory substance | Antral follicle | Primordial follicle      |

(Kezele *et al.*, 2002b). The current review discusses the roles of some of these factors (KL, bFGF, LIF, KGF and BMP-4) in mediating interactions between precursor theca cells, granulosa cells and the oocyte with a focus on primordial follicle development.

### **Kit ligand**

The KL (also termed stem cell factor, steel factor and multipotent growth factor) is a growth factor with both soluble and membrane bound forms that have a wide range of effects on various cell types (Besmer, 1991). KL was originally characterized because of its ability to influence stem cell growth and differentiation. The receptor for KL is the ckit tyrosine kinase receptor (Zsebo *et al.*, 1990). Previous studies on mice with mutations at the white-spotting (W) and steel (Sl) locus have demonstrated deficient gametogenesis (Russell, 1979; Silvers, 1979). The W locus encodes ckit (Chabot *et al.*, 1988) and the Sl locus the KL (Huang *et al.*, 1993). Different alleles are available that vary in phenotype from a total lack of germ cells to normal fertility in both males and females (Russell, 1979; Silvers, 1979; Chabot *et al.*, 1988). An interesting allele is the steel panda ( $Sl^{pan}/Sl^{pan}$ ) that has a relatively normal complement of primordial follicles and developing follicles arrested at the one layer cuboidal granulosa stage (i.e. primary follicle) (Huang *et al.*, 1993; Bedell *et al.*, 1995). This mutation appears to influence the level of KL produced (Huang *et al.*, 1993). The ability of this mutation to have a block at the primary stage of follicle development suggests that additional factors may compensate for the lack of KL expression during the primordial to primary follicle transition. *In situ* hybridization and immunocytochemistry for ckit with normal ovarian sections revealed high levels of expression in developing oocytes (Manova *et al.*, 1990; Horie *et al.*, 1991; Robinson *et al.*, 2001). Analysis of KL expression revealed high levels of KL expression in granulosa cells (Huang *et al.*, 1993; Manova *et al.*, 1993). The genetic evidence and localization studies suggested an important interaction between granulosa cells and oocytes via KL. *In vitro* studies with neutralizing antibodies and KL also support the importance of KL in granulosa cell controlled oocyte development (Packer *et al.*, 1994). The *in situ* analysis of ovary sections also revealed low levels of ckit in stromal-interstitial cells and theca cells (Manova *et al.*, 1990; Kang *et al.*, 2003). This observation led to the proposal that granulosa derived KL may also influence theca cell recruitment and proliferation. Observations demonstrate that granulosa derived KL has a role in the recruitment of theca cells from the stromal-interstitial cell population and subsequently regulates theca cell proliferation (Parrott and Skinner, 1999; Faddy, 2000; Kang *et al.*, 2003).

KL was found to induce the primordial to primary follicle transition (Parrott and Skinner, 1999). In this analysis, multiple experiments were performed in replicate such that over 7000 follicles were counted. The morphological criteria for primordial follicle development are shown in Figure 1. The stage 0 primordial follicles have a single oocyte and an incomplete layer of squamous (i.e. flattened) pre-granulosa cells and no theca cells. As the follicles develop, the granulosa cells develop a cuboidal structure and surround the oocyte while theca cells (i.e. pre-theca) are recruited from the stromal cells and organize around the follicle (Nilsson *et al.*, 2001) (Figure 1). KL produced by granulosa cells appears to act on the oocyte to stimulate it to enlarge and initiate development

(Parrott and Skinner, 1999; Kezele and Skinner, 2003). KL was found to stimulate stromal cell and theca cell growth. KL stimulates theca cell androgen production, but has no effect on stromal cell steroidogenesis (Parrott and Skinner, 2000). KL also was found to stimulate KGF and HGF mRNA levels in theca cells. KL expression was stimulated by gonadotropins, KGF and HGF. Therefore, KL appears to be a critical factor in primordial to primary follicle transition (Figure 1 and Table I).

### **Basic fibroblast growth factor**

bFGF has been localized to the oocytes of primordial and primary follicles of several species (van Wezel *et al.*, 1995; Nilsson *et al.*, 2001). The bFGF is localized to granulosa cells of developing preantral follicles, but not to granulosa cells of human primordial follicles (Yamamoto *et al.*, 1997). Theca cells of developing follicles also stain positive for bFGF (van Wezel *et al.*, 1995; Yamamoto *et al.*, 1997). Receptors for bFGF have been reported in rat (Shikone *et al.*, 1992) and cow (Wandji *et al.*, 1992) antral granulosa cells. bFGF is important in regulating a wide range of ovarian functions including granulosa cell mitosis (Gospodarowicz *et al.*, 1989; Lavranos *et al.*, 1994), steroidogenesis (Vernon and Spicer, 1994), differentiation (Anderson and Lee, 1993) and apoptosis (Tilly *et al.*, 1992). In addition, bovine granulosa cells have been shown to produce bFGF (Neufeld *et al.*, 1987) in the preantral and antral follicle stages.

When 4-day-old rat ovary organ cultures were treated with bFGF there was a dramatic increase in primordial follicle development similar to that observed with KL (Nilsson *et al.*, 2001). Organ cultures treated with EGF, insulin-like growth factor-I (IGF-I) or HGF did not alter follicle development (Parrott and Skinner, 1999; Nilsson *et al.*, 2001). The effects of bFGF on the ovary cross-sections after 14 days of treatment was investigated with multiple experiments done in replicate (Nilsson *et al.*, 2001). bFGF treatment dramatically decreased primordial follicle numbers and increased the number of developing follicles, similar to the actions of KL (Parrott and Skinner, 1999; Nilsson *et al.*, 2001). Therefore, bFGF, like KL, appears to be a primordial follicle inducing factor. bFGF was found to be primarily localized to the oocyte of the primordial and early stage follicles. bFGF was found to stimulate both theca cell and stromal cell growth (Nilsson *et al.*, 2001), as has previously been shown for granulosa cells (Gospodarowicz *et al.*, 1989; Lavranos *et al.*, 1994). Therefore, bFGF produced by the oocyte appears to act on the adjacent somatic cells to influence primordial follicle development (Figure 1 and Table I).

### **Leukemia inhibitory factor**

LIF is a factor that acts at a specific GP130 transducing receptor involving the JAK-STAT pathway (Gadient and Patterson, 1999) to influence a number of developmental systems (Abe *et al.*, 1991; Taupin *et al.*, 1998). LIF has been shown to be a differentiation inducer and an influence stem cells in various tissues (Abe *et al.*, 1991). An LIF knockout was shown to influence implantation (Stewart and Cullinan, 1997) and LIF has a role in pregnancy and uterine biology (Senturk and Arici, 1998; Vogiagis and Salamonsen, 1999; Kholkute *et al.*, 2000). Detailed analysis of the ovaries of LIF knockout mice remains to be carried out, but they do have the potential to ovulate. LIF has been shown to be present in follicular

fluid and appears to be at higher levels as the follicle develops (Coskun *et al.*, 1998; Ozornek *et al.*, 1999). Like KL, LIF has been shown to influence primordial germ cells *in vitro* and *in vivo* (Morita *et al.*, 1999), but its role in oocyte development remains to be elucidated (Shim and Anderson, 1998).

When 4-day-old rat ovary organ cultures were treated with LIF, there was an increase in primordial to primary follicle transition, (Nilsson *et al.*, 2002). LIF treatment resulted in a dramatic decrease in primordial follicle numbers and corresponding increase in developing follicle numbers. A previous study suggests that insulin (Figure 1), but not IGF-I, can enhance primordial follicle development (Kezele *et al.*, 2002a). Insulin was found to enhance LIF actions on the primordial follicles (Nilsson *et al.*, 2002). The LIF neutralizing antibody also decreased slightly the spontaneous follicle development observed in control cultures, (Nilsson *et al.*, 2002). Therefore, LIF can promote primordial follicle development (Figure 1), and LIF neutralizing antibody can partially inhibit spontaneous follicle development. These data are similar to that observed with KL neutralizing antibodies.

#### **Keratinocyte growth factor**

A mesenchymal-derived growth factor that mediates mesenchymal-epithelial interactions is KGF. KGF is a fibroblast growth factor (FGF7), -related molecule found to stimulate epithelial cell proliferation (Rubin *et al.*, 1989). KGF is a 28 kDa protein that appears to primarily be produced by mesenchymal cells and is an epithelial cell mitogen (Finch *et al.*, 1989). The receptor to KGF is an FGF receptor isoform, FGFR2 splice variant that specifically binds KGF (Miki *et al.*, 1991). The KGF receptor appears to be primarily localized on epithelial cells (Miki *et al.*, 1992). Previous studies have documented the production of KGF by theca cells from antral follicles and its potential to influence granulosa cell growth (Parrott and Skinner, 1998).

KGF has also been found to stimulate the primordial to primary follicle transition (Nilsson and Skinner, 2003; Kezele *et al.*, submitted for publication). When 4-day-old rat ovaries were cultured in the presence of 50 ng/mL, KGF a significant increase in primordial follicle transition was observed with a corresponding decrease in primordial follicle numbers. KGF is localized to the newly recruited precursor theca cells in contact with the layer of developing granulosa cells (Kezele *et al.*, submitted for publication). This suggests that the KGF is produced by the recruited precursor theca cells and acts on the adjacent granulosa cell. This is one of the first specific markers for this developing precursor theca cell population and supports the concept that precursor theca cells are an integral part of primordial follicle development (Figure 1 and Table I).

#### **Bone morphogenic proteins**

The BMP family of growth factors is in the TGF $\beta$  superfamily. The first BMP shown to be associated with primordial follicle development was BMP-15 (Dean, 2002). BMP-15 is produced by oocytes and appears to influence follicle development (Dube *et al.*, 1998). The regulatory role of BMP-15 on primordial follicle development remains to be elucidated. Other BMPs have been found to influence antral follicle development (Shimasaki *et al.*, 1999; Dobens and Raftery, 2000; Elvin *et al.*, 2000). BMP-7 appears to have a role in early follicle development (Lee *et al.*,

2001, 2004) and involves a stroma cell interaction with the primordial follicle (Figure 1 and Table I).

BMP-4 has been shown to promote the primordial to primary follicle transition and appears to be essential for oocyte survival (Nilsson and Skinner, 2003). BMP-4 has been shown to be primarily produced by mesenchymal cells and act on adjacent epithelial cells (Winnier *et al.*, 1995; Lawson *et al.*, 1999). A previous study demonstrated that the developing theca cells produce BMP-4 to act on granulosa cells to sustain oocyte survival. BMP-4 was found to significantly increase primordial to primary follicle transition (Nilsson and Skinner, 2003). Immunocytochemistry for BMP-4 detected BMP-4 in the theca cells associated with the primary follicles (Nilsson and Skinner, 2003), similar to KGF expression (Kezele *et al.*, submitted for publication). In contrast, BMP-4 was also found in islands of stromal cells not associated with the follicles using immunocytochemistry. Interestingly, when a neutralizing antibody to BMP-4 was used in the organ culture, all the oocytes in the organs initiated apoptosis and were lost within 14 days of culture (Nilsson and Skinner, 2003). Observations suggest that BMP-4 is a required survival factor for the primordial follicle and oocyte (Figure 1 and Table I).

#### **Müllerian inhibiting substance**

Müllerian inhibiting substance (MIS) or Anti-Müllerian Hormone (AMH) has been shown to regulate primordial follicle development (Durlinger *et al.*, 1999, 2001, 2002; Gruijters *et al.*, 2003; Salmon *et al.*, 2004; Weenen *et al.*, 2004; Visser and Themmen, 2005). MIS/AMH is not expressed in the primordial follicle, but appears to have the capacity to block primordial follicle development and is derived from developing follicles (Durlinger *et al.*, 2001, 2002; Gruijters *et al.*, 2003; Salmon *et al.*, 2004; Weenen *et al.*, 2004; Visser and Themmen, 2005) (Figure 1 and Table I). MIS/AMH is produced in the early secondary follicles, the preantral follicles and antral follicles (Visser and Themmen, 2005). Similar expression patterns are seen in the human ovary (Weenen *et al.*, 2004). Therefore, MIS/AMH produced by the developing follicles can inhibit primordial follicle development (Durlinger *et al.*, 1999, 2001, 2002; Gruijters *et al.*, 2003; Salmon *et al.*, 2004; Weenen *et al.*, 2004; Visser and Themmen, 2005) (Figure 1). Currently this is the only negative regulatory factor for primordial to primary follicle transition. The ability of developing follicles to feedback and regulate primordial follicle development provides an efficient communication between follicles.

#### **Other factors**

Several additional factors have been shown to be associated with primordial follicles or mutations in the factor (e.g. knockout) that alter primordial follicle development. Growth factors that are associated with primordial follicles include EGF, TGF $\alpha$  and EGF receptor (Singh and Armstrong, 1995; Singh *et al.*, 1995; Qu *et al.*, 2000; Silva *et al.*, 2004), neurotrophins (Dissen *et al.*, 2002; Paredes *et al.*, 2004) and activins (Martins da Silva *et al.*, 2004). These factors have not been shown to directly regulate primordial to primary follicle transition, but require further investigation. Knockout mice have also suggested roles for factors in primordial follicle development (Galloway *et al.*, 2000; Matzuk, 2000; Vitt *et al.*, 2000; Mazerbourg and Hsueh, 2003). Several transcription

**Table II.** Primordial follicle associated transcription factors

| Transcription factor      | Family                 |
|---------------------------|------------------------|
| Aryl hydrocarbon receptor | Basic helix-loop-helix |
| Fig $\alpha$              | Basic helix-loop-helix |
| Fox12                     | Wing helix             |
| NOBOX                     | Homeobox               |

factors have been shown to be essential for oocyte survival and primordial follicle development including a transcription factor (aryl hydrocarbon receptor) (Robles *et al.*, 2000; Matzuk, 2001), basic-helix-loop-helix transcription factor Fig $\alpha$  (Dean, 2002; Bayne *et al.*, 2004), a winged-helix transcription factor Fox12 (Schmidt *et al.*, 2004) and a homeobox NOBOX gene in oocytes (Rajkovic *et al.*, 2004) (Table II). The specific roles of many of these factors in the regulation of primordial follicle development remain to be elucidated.

Another factor investigated as a regulatory agent in the induction of primordial follicles is growth differentiation factor-9 (GDF-9). GDF-9 is a member of the TGF $\beta$  family and is expressed by oocytes in the primary stage of follicle development through ovulation (Dong *et al.*, 1996; Mazerbourg and Hsueh, 2003). A GDF-9 homologue GDF-9B was identified as BMP-15 (Aaltonen *et al.*, 1999; Jaatinen *et al.*, 1999). Synergistic actions of GDF-9 and BMP-15 have a role in oocyte-cumulus cell interactions in developing follicles (Su *et al.*, 2004; McNatty *et al.*, 2005), but not in primordial follicles (Juengel *et al.*, 2004). GDF-9 knockout mice have a block in follicle development at the primary stage (Carabatsos *et al.*, 1998; Elvin *et al.*, 1999). This and localization data (Vitt and Hsueh, 2001) suggests that GDF-9 does not influence primordial follicles. A recent report suggests that GDF-9 may influence follicle growth factor expression such as KL (Joyce *et al.*, 2000; Wang and Roy, 2004). How GDF-9 may influence primordial follicle development was investigated. Four-day-old rat ovary organ cultures were treated with GDF-9 for 14 days and then follicle development was examined. GDF-9 was found to have no influence on primordial to primary follicle transition, (Nilsson and Skinner, 2002). None of the stage 0–2 follicle numbers changed after an optimal dose (100 ng/mL) of GDF-9 (Nilsson and Skinner, 2002). GDF-9 was found to influence granulosa cell gene expression demonstrating its bioactivity (Nilsson and Skinner, 2002). GDF-9 is initially expressed at the primary stage 2 follicle (Matzuk, 2000). Observations suggest that GDF-9 may influence primary follicle progression, but does not appear to have a role in primordial follicle development (Nilsson and Skinner, 2002). As discussed above, factors found not to influence primordial follicle development are GDF-9, IGFI, EGF and HGF. Therefore, among the factors investigated KL, bFGF, LIF, KGF, MIS, insulin and BMP-4 are specific in their ability to influence primordial follicles (Figure 1 and Table I).

## Summary

The previous studies demonstrated the importance of cell–cell interactions involved in primordial follicle development. The hypothesis and potential cell–cell interactions examined are schematically shown in Figure 1. The primordial to primary follicle transition is distinct from subsequent follicle development because

of hormone independence and less differentiated cell populations. The role KL, bFGF, KGF, BMP-4 and LIF have in this process of primordial to primary follicle transition has been established. The control of primordial follicle assembly appears to be distinct from the control of primordial to primary follicle transition. The proposed current model is shown in Figure 1 regarding primordial follicle development.

Primordial follicle assembly and development are highly conserved processes in mammalian species. Because of this high degree of evolutionary conservation, the regulation of primordial follicle development is speculated to be similar among different species, including humans. Slight morphological differences and distinct developmental timing should not be interpreted as major differences in the regulation of the process. Because of the need to assure reproductive success, the regulatory mechanisms likely have a high degree of compensation such that multiple factors are involved. For this reason, null mutations in specific factors (e.g. bFGF or LIF) do not have major primordial follicle phenotypes, due to compensation by other factors. Further investigation into the regulatory mechanisms controlling primordial follicle development in different species is needed to confirm this speculation. The hypothesis has proposed that the regulatory mechanisms and cell–cell interaction summarized in Figure 1 are common among species including humans.

The cell–cell interactions required during follicle development are speculated to be mediated in part through the local production and actions of a variety of factors (Parrott and Skinner, 1999, 2000; Nilsson *et al.*, 2001, 2002; Kezele *et al.*, 2002b, 2005; Nilsson and Skinner, 2002, 2003, 2004; Kezele and Skinner, 2003). How these different factors interact and the sequence of cellular interactions required remain to be elucidated. Inappropriate expression and action of these growth factors may result in the abnormal ovarian physiology associated with specific forms of infertility and ovarian pathology (e.g. POF). Therefore, the studies reviewed provide insights into the specific factors that may regulate the onset and progression of primordial follicle development. This information is critical to the future design of diagnostic procedures and therapeutic treatments of ovarian pathologies associated with primordial follicle development.

Human health issues where a manipulation of the primordial follicle pool size and alterations in primordial follicle development could be important include (i) increasing the initial primordial follicle pool size to increase the longevity of female fertility; (ii) delay the development of primordial follicles to delay the decrease in the pool size and delay onset of menopause; (iii) manipulate primordial follicle pool size to regulate the onset and timing of menopause and (iv) increase primordial follicle development to increase fertility in subfertile women. The basic information reviewed identifies potential therapeutic targets to potentially manipulate primordial follicle development. Several human disease states also exist that could benefit from such a therapeutic approach. Subfertile women could potentially increase fertility by increasing primordial follicle development to obtain a normal cohort of follicles. The premature menopausal woman could prolong fertility and the onset of menopause by inhibiting primordial follicle development. The POF patient could be treated with a therapeutic agent to inhibit primordial follicle development and thus allow fertility at a later date.

Future studies also will need to involve the development of diagnostic assays to assess potential mutations in the genes for the growth factors and receptors found to be associated with primordial follicle development. This type of assay could include single nucleotide polymorphism or mutation arrays. Such an assay could potentially diagnose and elucidate the genetic causal factors in disease states such as POF in humans and be used to identify high-risk patients.

## Acknowledgements

Thanks to Dr. Eric Nilsson for critically reviewing the manuscript and Ms. Jill Griffin for assistance in the preparation of the manuscript.

## References

- Aaltonen J, Laitinen MP, Vuojolainen K, Jaatinen R, Horelli-Kuitunen N, Seppä L, Louhio H, Tuuri T, Sjöberg J, Butzow R *et al.* (1999) Human growth differentiation factor 9 (GDF-9) and its novel homolog GDF-9B are expressed in oocytes during early folliculogenesis. *J Clin Endocrinol Metab* 84,2744–2750.
- Abe T, Ohno M, Sato T, Murakami M, Kajiki M and Kodaira R (1991) “Differentiation induction” culture of human leukemic myeloid cells stimulates high production of macrophage differentiation inducing factor. *Cytotechnology* 5(Suppl. 2),S75–S93.
- Adashi EY (1994) Endocrinology of the ovary. *Hum Reprod* 9,815–827.
- Adashi EY (1998) The IGF family and folliculogenesis. *J Reprod Immunol* 39,13–19.
- Anderson E and Lee GY (1993) The participation of growth factors in simulating the quiescent, proliferative, and differentiative stages of rat granulosa cells grown in a serum-free medium. *Tissue Cell* 25,49–72.
- Balla A, Danilovich N, Yang Y and Sairam MR (2003) Dynamics of ovarian development in the FORKO immature mouse: structural and functional implications for ovarian reserve. *Biol Reprod* 69,1281–1293.
- Bath LE, Wallace WH, Shaw MP, Fitzpatrick C and Anderson RA (2003) Depletion of ovarian reserve in young women after treatment for cancer in childhood: detection by anti-Mullerian hormone, inhibin B and ovarian ultrasound. *Hum Reprod* 18,2368–2374.
- Bayne RA, Martins da Silva SJ and Anderson RA (2004) Increased expression of the FIGLA transcription factor is associated with primordial follicle formation in the human fetal ovary. *Mol Hum Reprod* 10,373–381.
- Bedell MA, Brannan CI, Evans EP, Copeland NG, Jenkins NA and Donovan PJ (1995) DNA rearrangements located over 100 kb 5' of the Steel (Sl)-coding region in Steel-panda and Steel-contrasted mice deregulate Sl expression and cause female sterility by disrupting ovarian follicle development. *Genes Dev* 9,455–470.
- Besmer P (1991) The kit ligand encoded at the murine Steel locus: a pleiotropic growth and differentiation factor. *Curr Opin Cell Biol* 3,939–946.
- Braw-Tal R and Roth Z (2005) Gene expression for LH receptor, 17 alpha-hydroxylase and STAR in the theca interna of preantral and early antral follicles in the bovine ovary. *Reproduction* 129,453–461.
- Campbell BK, Telfer EE, Webb R and Baird DT (2004) Evidence of a role for follicle-stimulating hormone in controlling the rate of preantral follicle development in sheep. *Endocrinology* 145,1870–1879.
- Carabatsos MJ, Elvin J, Matzuk MM and Albertini DF (1998) Characterization of oocyte and follicle development in growth differentiation factor-9-deficient mice. *Dev Biol* 204,373–384.
- Chabot B, Stephenson DA, Chapman VM, Besmer P and Bernstein A (1988) The proto-oncogene c-kit encoding a transmembrane tyrosine kinase receptor maps to the mouse W locus. *Nature* 335,88–89.
- Channing CP (1980) Progesterone and estrogen secretion by cultured monkey ovarian cell types: influences of follicular size, serum luteinizing hormone levels, and follicular fluid estrogen levels. *Endocrinology* 107,342–352.
- Cortvriendt R and Smits J (2001) *In vitro* follicle growth: achievements in mammalian species. *Reprod Domest Anim*, 36,3–9.
- Coskun S, Uzumcu M, Jaroudi K, Hollanders JM, Parhar RS and al-Sedairy ST (1998) Presence of leukemia inhibitory factor and interleukin-12 in human follicular fluid during follicular growth. *Am J Reprod Immunol* 40,13–18.
- De Felici M (2000) Regulation of primordial germ cell development in the mouse. *Int J Dev Biol* 44,575–580.
- Dean J (2002) Oocyte-specific genes regulate follicle formation, fertility and early mouse development. *J Reprod Immunol* 53,171–180.
- Depalo R, Nappi L, Loverro G, Bettocchi S, Caruso ML, Valentini AM and Selvaggi L (2003) Evidence of apoptosis in human primordial and primary follicles. *Hum Reprod* 18,2678–2682.
- Derrar N, Price CA and Sirard MA (2000) Effect of growth factors and co-culture with ovarian medulla on the activation of primordial follicles in explants of bovine ovarian cortex. *Theriogenology* 54,587–598.
- Dissen GA, Romero C, Hirshfield AN and Ojeda SR (2001) Nerve growth factor is required for early follicular development in the mammalian ovary. *Endocrinology* 142,2078–2086.
- Dissen GA, Romero C, Paredes A and Ojeda SR (2002) Neurotrophic control of ovarian development. *Microsc Res Tech* 59,509–515.
- Dobens LL and Raftery LA (2000) Integration of epithelial patterning and morphogenesis in *Drosophila* ovarian follicle cells. *Dev Dyn* 218,80–93.
- Dong J, Albertini DF, Nishimori K, Kumar TR, Lu N and Matzuk MM (1996) Growth differentiation factor-9 is required during early ovarian folliculogenesis. *Nature* 383,531–535.
- Dube JL, Wang P, Elvin J, Lyons KM, Celeste AJ and Matzuk MM (1998) The bone morphogenetic protein 15 gene is X-linked and expressed in oocytes. *Mol Endocrinol* 12,1809–1817.
- Durlinger AL, Kramer P, Karels B, de Jong FH, Uilenbroek JT, Grootegoed JA and Themmen AP (1999) Control of primordial follicle recruitment by anti-Mullerian hormone in the mouse ovary. *Endocrinology* 140,5789–5796.
- Durlinger AL, Grijters MJ, Kramer P, Karels B, Kumar TR, Matzuk MM, Rose UM, de Jong FH, Uilenbroek JT, Grootegoed JA *et al.* (2001) Anti-Mullerian hormone attenuates the effects of FSH on follicle development in the mouse ovary. *Endocrinology* 142,4891–4899.
- Durlinger AL, Visser JA and Themmen AP (2002) Regulation of ovarian function: the role of anti-Mullerian hormone. *Reproduction* 124,601–609.
- Elvin JA, Yan C, Wang P, Nishimori K and Matzuk MM (1999) Molecular characterization of the follicle defects in the growth differentiation factor 9-deficient ovary. *Mol Endocrinol* 13,1018–1034.
- Elvin JA, Yan C and Matzuk MM (2000) Oocyte-expressed TGF-beta superfamily members in female fertility. *Mol Cell Endocrinol* 159,1–5.
- Erickson GF (1983) Primary cultures of ovarian cells in serum-free medium as models of hormone-dependent differentiation. *Mol Cell Endocrinol* 29,21–49.
- Erickson GF (2001) Role of growth factors in ovary organogenesis. *J Soc Gynecol Invest* 8,S13–S16.
- Erickson GF and Ryan KJ (1976) Stimulation of testosterone production in isolated rabbit thecal tissue by LH/FSH, dibutyryl cyclic AMP, PGE2alpha, and PGE2. *Endocrinology* 99,452–458.
- Evans G, Dobias M, King GJ and Armstrong DT (1981) [Estrogen, androgen, and progesterone biosynthesis by theca and granulosa of preovulatory follicles in the pig.] *Biol Reprod*, 25,673–682.
- Faddy MJ (2000) Follicle dynamics during ovarian ageing. *Mol Cell Endocrinol*, 163,43–48.
- Faddy MJ and Gosden RG (1995) A mathematical model of follicle dynamics in the human ovary. *Hum Reprod* 10,770–775.
- Faddy MJ and Gosden RG (1996) A model conforming the decline in follicle numbers to the age of menopause in women. *Hum Reprod* 11,1484–1486.
- Finch PW, Rubin JS, Miki T, Ron D and Aaronson SA (1989) Human KGF is FGF-related with properties of a paracrine effector of epithelial cell growth. *Science* 245,752–755.
- Flaws JA, Hirshfield AN, Hewitt JA, Babus JK and Furth PA (2001) Effect of bcl-2 on the primordial follicle endowment in the mouse ovary. *Biol Reprod*, 64,1153–1159.
- Fortune JE (1994) Ovarian follicular growth and development in mammals. *Biol Reprod* 50,225–232.
- Fortune JE (2003) The early stages of follicular development: activation of primordial follicles and growth of preantral follicles. *Anim Reprod Sci* 78,135–163.
- Fortune JE and Armstrong DT (1977) Androgen production by theca and granulosa isolated from proestrous rat follicles. *Endocrinology* 100,1341–1347.
- Fortune JE, Kito S, Wandji SA and Srsen V (1998) Activation of bovine and baboon primordial follicles *in vitro*. *Theriogenology* 49,441–449.
- Fortune JE, Cushman RA, Wahl CM and Kito S (2000) The primordial to primary follicle transition. *Mol Cell Endocrinol* 163,53–60.
- Foxcroft GR and Hunter MG (1985) Basic physiology of follicular maturation in the pig. *J Reprod Fertil Suppl*, 33,1–19.
- Gadient RA and Patterson PH (1999) Leukemia inhibitory factor, Interleukin 6, and other cytokines using the GP130 transducing receptor: roles in inflammation and injury. *Stem Cells* 17,127–137.



- Galloway SM, McNatty KP, Cambridge LM, Laitinen MP, Juengel JL, Jokiranta TS, McLaren RJ, Luiro K, Dodds KG, Montgomery GW *et al.* (2000) Mutations in an oocyte-derived growth factor gene (BMP15) cause increased ovulation rate and infertility in a dosage-sensitive manner. *Nat Genet* 25,279–283.
- Gosden RG and Faddy MJ (1998) Biological bases of premature ovarian failure. *Reprod Fertil Dev* 10,73–78.
- Gospodarowicz D, Plouet J and Fujii DK (1989) Ovarian germinal epithelial cells respond to basic fibroblast growth factor and express its gene: implications for early folliculogenesis. *Endocrinology* 125,1266–1276.
- Gougeon A and Busso D (2000) Morphologic and functional determinants of primordial and primary follicles in the monkey ovary. *Mol Cell Endocrinol* 163,33–42.
- Grobstein C (1967) Mechanisms of organogenetic tissue interaction. *J Natl Cancer Inst Monogr* 26,279–299.
- Gruijters MJ, Visser JA, Durlinger AL and Themmen AP (2003) Anti-Müllerian hormone and its role in ovarian function. *Mol Cell Endocrinol* 211,85–90.
- Guigon CJ, Mazaud S, Forest MG, Brailly-Tabard S, Coudouel N and Magre S (2003) Unaltered development of the initial follicular waves and normal pubertal onset in female rats after neonatal deletion of the follicular reserve. *Endocrinology* 144,3651–3662.
- Haney AF and Schomberg DW (1981) Estrogen and progesterone production by developing porcine follicles *in vitro*: evidence for estrogen formation by theca. *Endocrinology* 109,971–977.
- Herrera L, Ottolenghi C, Garcia-Ortiz JE, Pellegrini M, Manini F, Ko MS, Nagaraja R, Forabosco A and Schlessinger D (2005) Mouse ovary developmental RNA and protein markers from gene expression profiling. *Dev Biol* 279,271–290.
- Hirshfield AN (1991) Development of follicles in the mammalian ovary. *Int Rev Cytol* 124,43–101.
- Horie K, Takakura K, Taii S, Narimoto K, Noda Y, Nishikawa S, Nakayama H, Fujita J and Mori T (1991) The expression of c-kit protein during oogenesis and early embryonic development. *Biol Reprod* 45,547–552.
- Hovatta O (2000) Cryopreservation and culture of human primordial and primary ovarian follicles. *Mol Cell Endocrinol* 169,95–97.
- Hovatta O, Wright C, Krausz T, Hardy K and Winston RM (1999) Human primordial, primary and secondary ovarian follicles in long-term culture: effect of partial isolation. *Hum Reprod* 14,2519–2524.
- Huang EJ, Manova K, Packer AI, Sanchez S, Bachvarova RF and Besmer P (1993) The murine steel panda mutation affects kit ligand expression and growth of early ovarian follicles. *Dev Biol* 157,100–109.
- Hussein MR (2005) Apoptosis in the ovary: molecular mechanisms. *Hum Reprod Update* 11,162–177.
- Jaatinen R, Laitinen MP, Vuojolainen K, Aaltonen J, Louhio H, Heikinheimo K, Lehtonen E and Ritvos O (1999) Localization of growth differentiation factor-9 (GDF-9) mRNA and protein in rat ovaries and cDNA cloning of rat GDF-9 and its novel homolog GDF-9B. *Mol Cell Endocrinol* 156,189–193.
- Johnson J, Canning J, Kaneko T, Pru JK and Tilly JL (2004) Germline stem cells and follicular renewal in the postnatal mammalian ovary. *Nature* 428,145–150.
- Joyce IM, Clark AT, Pendola FL and Eppig JJ (2000) Comparison of recombinant growth differentiation factor-9 and oocyte regulation of KIT ligand messenger ribonucleic acid expression in mouse ovarian follicles. *Biol Reprod* 63,1669–1675.
- Juengel JL, Bodensteiner KJ, Heath DA, Hudson NL, Moeller CL, Smith P, Galloway SM, Davis GH, Sawyer HR and McNatty KP (2004) Physiology of GDF9 and BMP15 signalling molecules. *Anim Reprod Sci* 82–83, 447–460.
- Kang JS, Lee CJ, Lee JM, Rha JY, Song KW and Park MH (2003) Follicular expression of c-Kit/SCF and inhibin- $\alpha$  in mouse ovary during development. *J Histochem Cytochem* 51,1447–1458.
- Kezele P, Nilsson E and Skinner MK (2002a) Cell–cell interactions in primordial follicle assembly and development. *Front Biosci* 7,d1990–d1996.
- Kezele PR, Nilsson EE and Skinner MK (2002b) Insulin but not insulin-like growth factor-1 promotes the primordial to primary follicle transition. *Mol Cell Endocrinol* 192,37–43.
- Kezele P and Skinner MK (2003) Regulation of ovarian primordial follicle assembly and development by estrogen and progesterone: endocrine model of follicle assembly. *Endocrinology* 144,3329–3337.
- Kezele P, Nilsson EE and Skinner MK (2005) Keratinocyte growth factor acts as a mesenchymal factor to promote ovarian primordial to primary follicle transition. *Biol Reprod*. (In press).
- Kezele PR, Ague JM, Nilsson E and Skinner MK (2005) Alterations in the ovarian transcriptome during primordial follicle assembly and development. *Biol Reprod* 72,241–255.
- Kholkute SD, Katkam RR, Nandedkar TD and Puri CP (2000) Leukaemia inhibitory factor in the endometrium of the common marmoset *Callithrix jacchus*: localization, expression and hormonal regulation. *Mol Hum Reprod* 6,337–343.
- Kratochwil K (1972) Tissue interaction during embryonic development. In Tarin D (ed.) *General Properties of Tissue Interactions in Carcinogenesis*. Academic Press, New York, pp.1–47.
- Lass A (2001) Assessment of ovarian reserve – is there a role for ovarian biopsy? *Hum Reprod* 16,1055–1057.
- Lavranos TC, Rodgers HF, Bertoncello I and Rodgers RJ (1994) Anchorage-independent culture of bovine granulosa cells: the effects of basic fibroblast growth factor and dibutyryl cAMP on cell division and differentiation. *Exp Cell Res* 211,245–251.
- Lawson KA, Dunn NR, Roelen BA, Zeinstra LM, Davis AM, Wright CV, Korving JP and Hogan BL (1999) Bmp4 is required for the generation of primordial germ cells in the mouse embryo. *Genes Dev* 13,424–436.
- Lee WS, Otsuka F, Moore RK and Shimasaki S (2001) Effect of bone morphogenetic protein-7 on folliculogenesis and ovulation in the rat. *Biol Reprod* 65,994–999.
- Lee WS, Yoon SJ, Yoon TK, Cha KY, Lee SH, Shimasaki S, Lee S and Lee KA (2004) Effects of bone morphogenetic protein-7 (BMP-7) on primordial follicular growth in the mouse ovary. *Mol Reprod Dev* 69,159–163.
- Lintern-Moore S and Moore GP (1979) The initiation of follicle and oocyte growth in the mouse ovary. *Biol Reprod* 20,773–778.
- Liu J, Van der Elst J, Van den Broecke R and Dhont M (2001) Live offspring by *in vitro* fertilization of oocytes from cryopreserved primordial mouse follicles after sequential *in vivo* transplantation and *in vitro* maturation. *Biol Reprod* 64,171–178.
- Lunenfeld B, Kraiem Z and Eshkol A (1975) The function of the growing follicle. *J Reprod Fertil* 45,567–574.
- Manova K, Nocka K, Besmer P and Bachvarova RF (1990) Gonadal expression of c-kit encoded at the W locus of the mouse. *Development* 110,1057–1069.
- Manova K, Huang EJ, Angeles M, De Leon V, Sanchez S, Pronovost SM, Besmer P and Bachvarova RF (1993) The expression pattern of the c-kit ligand in gonads of mice supports a role for the c-kit receptor in oocyte growth and in proliferation of spermatogonia. *Dev Biol* 157,85–99.
- Marcinkiewicz JL, Balchak SK and Morrison LJ (2002) The involvement of tumor necrosis factor- $\alpha$  (TNF) as an intraovarian regulator of oocyte apoptosis in the neonatal rat. *Front Biosci* 7,1997–2005.
- Martins da Silva, SJ, Bayne RA, Cambray N, Hartley PS, McNeilly AS and Anderson RA (2004) Expression of activin subunits and receptors in the developing human ovary: activin A promotes germ cell survival and proliferation before primordial follicle formation. *Dev Biol* 266,334–345.
- Matzuk MM (2000) Revelations of ovarian follicle biology from gene knockout mice. *Mol Cell Endocrinol* 163,61–66.
- Matzuk MM (2001) Eggs in the balance. *Nat Genet*, 28,300–301.
- Mayer LP, Devine PJ, Dyer CA and Hoyer PB (2004) The follicle-deplete mouse ovary produces androgen. *Biol Reprod* 71,130–138.
- Mazerbourg S and Hsueh AJ (2003) Growth differentiation factor-9 signaling in the ovary. *Mol Cell Endocrinol* 202,31–36.
- McGee EA and Hsueh AJ (2000) Initial and cyclic recruitment of ovarian follicles. *Endocr Rev* 21,200–214.
- McNatty KP, Makris A, DeGrazia C, Osathanondh R and Ryan KJ (1979) The production of progesterone, androgens, and estrogens by granulosa cells, thecal tissue, and stromal tissue from human ovaries *in vitro*. *J Clin Endocrinol Metab* 49,687–699.
- McNatty KP, Fidler AE, Juengel JL, Quirke LD, Smith PR, Heath DA, Lundy T, O'Connell A and Tisdall DJ (2000) Growth and paracrine factors regulating follicular formation and cellular function. *Mol Cell Endocrinol* 163,11–20.
- McNatty KP, Juengel JL, Reader KL, Lun S, Myllymaa S, Lawrence SB, Western A, Meerasahib MF, Mottershead DG, Groome NP *et al.* (2005) Bone morphogenetic protein 15 and growth differentiation factor 9 co-operate to regulate granulosa cell function in ruminants. *Reproduction* 129,481–487.
- Meirow D and Nugent D (2001) The effects of radiotherapy and chemotherapy on female reproduction. *Hum Reprod Update* 7,535–543.
- Meredith S, Dudenhoefter G and Jackson K (2000) Classification of small type B/C follicles as primordial follicles in mature rats. *J Reprod Fertil* 119,43–48.
- Miki T, Fleming TP, Bottaro DP, Rubin JS, Ron D and Aaronson SA (1991) Expression cDNA cloning of the KGF receptor by creation of a transforming autocrine loop. *Science* 251,72–75.

- Miki T, Bottaro DP, Fleming TP, Smith CL, Burgess WH, Chan AM and Aaronson SA (1992) Determination of ligand-binding specificity by alternative splicing: two distinct growth factor receptors encoded by a single gene. *Proc Natl Acad Sci USA* 89,246–250.
- Miller PB, Charleston JS, Battaglia DE, Klein NA and Soules MR (1999) Morphometric analysis of primordial follicle number in pigtailed monkey ovaries: symmetry and relationship with age. *Biol Reprod* 61,553–556.
- Montano MM, Welshons WV and vom Saal FS (1995) Free estradiol in serum and brain uptake of estradiol during fetal and neonatal sexual differentiation in female rats. *Biol Reprod* 53,1198–1207.
- Morita Y, Manganaro TF, Tao XJ, Martimbeau S, Donahoe PK and Tilly JL (1999) Requirement for phosphatidylinositol-3'-kinase in cytokine-mediated germ cell survival during fetal oogenesis in the mouse. *Endocrinology* 140,941–949.
- Murray A and Spears N (2000) Follicular development *in vitro*. *Semin Reprod Med* 18,109–122.
- Neufeld G, Ferrara N, Schweigerer L, Mitchell R and Gospodarowicz D (1987) Bovine granulosa cells produce basic fibroblast growth factor. *Endocrinology* 121,597–603.
- Nilsson E and Skinner MK (2001) Cellular interactions that control primordial follicle development and folliculogenesis. *J Soc Gynecol Investig* 8,S17–S20.
- Nilsson EE and Skinner MK (2002) Growth and differentiation factor-9 stimulates progression of early primary but not primordial rat ovarian follicle development. *Biol Reprod* 67,1018–1024.
- Nilsson EE and Skinner MK (2003) Bone morphogenetic protein-4 acts as an ovarian follicle survival factor and promotes primordial follicle development. *Biol Reprod*, 69,1265–1272.
- Nilsson EE and Skinner MK (2004) Kit ligand and basic fibroblast growth factor interactions in the induction of ovarian primordial to primary follicle transition. *Mol Cell Endocrinol* 214,19–25.
- Nilsson E, Parrott JA and Skinner MK (2001) Basic fibroblast growth factor induces primordial follicle development and initiates folliculogenesis. *Mol Cell Endocrinol* 175,123–130.
- Nilsson EE, Kezele P and Skinner MK (2002) Leukemia inhibitory factor (LIF) promotes the primordial to primary follicle transition in rat ovaries. *Mol Cell Endocrinol* 188,65–73.
- O'Brien MJ, Pendola JK and Eppig JJ (2003) A revised protocol for *in vitro* development of mouse oocytes from primordial follicles dramatically improves their developmental competence. *Biol Reprod* 68,1682–1686.
- Oktay K, Briggs D and Gosden RG (1997) Ontogeny of follicle-stimulating hormone receptor gene expression in isolated human ovarian follicles. *J Clin Endocrinol Metab* 82,3748–3751.
- Oktay K, Karlikaya G, Akman O, Ojadian GK and Oktay M (2000) Interaction of extracellular matrix and activin-A in the initiation of follicle growth in the mouse ovary. *Biol Reprod* 63,457–461.
- Ozornek MH, Bielfeld P, Krussel JS, Hirschenhain J, Jeyendran RS and Koldovsky U (1999) Epidermal growth factor and leukemia inhibitory factor levels in follicular fluid. Association with *in vitro* fertilization outcome. *J Reprod Med* 44,367–369.
- Packer AI, Hsu YC, Besmer P and Bachvarova RF (1994) The ligand of the c-kit receptor promotes oocyte growth. *Dev Biol* 161,194–205.
- Paredes A, Romero C, Dissen GA, DeChiara TM, Reichardt L, Cornea A, Ojeda SR and Xu B (2004) TrkB receptors are required for follicular growth and oocyte survival in the mammalian ovary. *Dev Biol* 267,430–449.
- Parrott JA and Skinner MK (1998) Thecal cell–granulosa cell interactions involve a positive feedback loop among keratinocyte growth factor, hepatocyte growth factor, and Kit ligand during ovarian follicular development. *Endocrinology* 139,2240–2245.
- Parrott JA and Skinner MK (1999) Kit-ligand/stem cell factor induces primordial follicle development and initiates folliculogenesis. *Endocrinology* 140,4262–4271.
- Parrott JA and Skinner MK (2000) Kit ligand actions on ovarian stromal cells: effects on theca cell recruitment and steroid production. *Mol Reprod Dev* 55,55–64.
- Peng C, Ohno T, Khorasheh S and Leung PC (1996) Activin and follistatin as local regulators in the human ovary. *Biol Signals* 5,81–89.
- Pepling ME and Spradling AC (1998) Female mouse germ cells form synchronously dividing cysts. *Development* 125,3323–3328.
- Pepling ME and Spradling AC (2001) Mouse ovarian germ cell cysts undergo programmed breakdown to form primordial follicles. *Dev Biol* 234,339–351.
- Pepling ME, de Cuevas M and Spradling AC (1999) Germline cysts: a conserved phase of germ cell development? *Trends Cell Biol* 9,257–262.
- Picton HM and Gosden RG (2000) *In vitro* growth of human primordial follicles from frozen-banked ovarian tissue. *Mol Cell Endocrinol* 166,27–35.
- Qu J, Godin PA, Nisolle M and Donnez J (2000) Distribution and epidermal growth factor receptor expression of primordial follicles in human ovarian tissue before and after cryopreservation. *Hum Reprod* 15,302–310.
- Rajah R, Glaser EM and Hirshfield AN (1992) The changing architecture of the neonatal rat ovary during histogenesis. *Dev Dyn* 194,177–192.
- Rajkovic A, Pangas SA, Ballow D, Suzumori N and Matzuk MM (2004) NOBOX deficiency disrupts early folliculogenesis and oocyte-specific gene expression. *Science* 305,1157–1159.
- Reynaud K and Driancourt MA (2000) Oocyte attrition. *Mol Cell Endocrinol* 163,101–108.
- Richards JS and Midgley Jr (1976) Protein hormone action: a key to understanding ovarian follicular and luteal cell development. *Biol Reprod* 14,82–94.
- Robinson LL, Gaskell TL, Saunders PT and Anderson RA (2001) Germ cell specific expression of c-kit in the human fetal gonad. *Mol Hum Reprod* 7,845–852.
- Robles R, Morita Y, Mann KK, Perez GI, Yang S, Matikainen T, Sherr DH and Tilly JL (2000) The aryl hydrocarbon receptor, a basic helix-loop-helix transcription factor of the PAS gene family, is required for normal ovarian germ cell dynamics in the mouse. *Endocrinology* 141,450–453.
- Rubin JS, Osada H, Finch PW, Taylor WG, Rudikoff S and Aaronson SA (1989) Purification and characterization of a newly identified growth factor specific for epithelial cells. *Proc Natl Acad Sci USA* 86,802–806.
- Russell ES (1979) Hereditary anemias of the mouse: a review for geneticists. *Adv Genet* 20,357–459.
- Salmon NA, Handyside AH and Joyce IM (2004) Oocyte regulation of anti-Müllerian hormone expression in granulosa cells during ovarian follicle development in mice. *Dev Biol* 266,201–208.
- Schlessinger D and Van Zant G (2001) Does functional depletion of stem cells drive aging? *Mech Ageing Dev* 122,1537–1553.
- Schmidt D, Ovitt CE, Anlag K, Fehsenfeld S, Gredsted L, Treier AC and Treier M (2004) The murine winged-helix transcription factor Foxl2 is required for granulosa cell differentiation and ovary maintenance. *Development* 131,933–942.
- Senturk LM and Arici, A (1998) Leukemia inhibitory factor in human reproduction. *Am J Reprod Immunol* 39,144–151.
- Serafica MD, Goto T and Trounson AO (2005) Transcripts from a human primordial follicle cDNA library. *Hum Reprod*, April 21 2005 [Epub ahead of print]
- Shikone T, Yamoto M and Nakano R (1992) Follicle-stimulating hormone induces functional receptors for basic fibroblast growth factor in rat granulosa cells. *Endocrinology* 131,1063–1068.
- Shim H and Anderson GB (1998) *In vitro* survival and proliferation of porcine primordial germ cells. *Theriogenology* 49,521–528.
- Shimasaki S, Zachow RJ, Li D, Kim H, Iemura S, Ueno N, Sampath K, Chang RJ and Erickson GF (1999) A functional bone morphogenetic protein system in the ovary. *Proc Natl Acad Sci USA* 96,7282–7287.
- Shirotta M, Soda S, Katoh C, Asai S, Sato M, Ohta R, Watanabe G, Taya K and Shirotta K (2003) Effects of reduction of the number of primordial follicles on follicular development to achieve puberty in female rats. *Reproduction* 125,85–94.
- Silva JR, van den Hurk R, de Matos MH, dos Santos RR, Pessoa C, de Moraes MO and de Figueiredo JR (2004) Influences of FSH and EGF on primordial follicles during *in vitro* culture of caprine ovarian cortical tissue. *Theriogenology* 61,1691–1704.
- Silvers WK (1979) *The Coat Colors of Mice*. Springer-Verlag, New York.
- Singh B and Armstrong DT (1995) Transforming growth factor alpha gene expression and peptide localization in porcine ovarian follicles. *Biol Reprod* 53,1429–1435.
- Singh B, Rutledge JM and Armstrong DT (1995) Epidermal growth factor and its receptor gene expression and peptide localization in porcine ovarian follicles. *Mol Reprod Dev* 40,391–399.
- Stewart CL and Cullinan, EB (1997) Preimplantation development of the mammalian embryo and its regulation by growth factors. *Dev Genet* 21,91–101.
- Su YQ, Wu X, O'Brien MJ, Pendola FL, Denegre JN, Matzuk MM and Eppig JJ (2004) Synergistic roles of BMP15 and GDF9 in the development and function of the oocyte-cumulus cell complex in mice: genetic evidence for an oocyte-granulosa cell regulatory loop. *Dev Biol* 276,64–73.
- Tanaka Y, Nakada K, Moriyoshi M and Sawamukai Y (2001) Appearance and number of follicles and change in the concentration of serum FSH in female bovine fetuses. *Reproduction* 121,777–782.

- Taupin JL, Pitard V, Dechanet J, Miossec V, Gualde N and Moreau JF (1998) Leukemia inhibitory factor: part of a large ingathering family. *Int Rev Immunol* 16,397–426.
- Telfer EE, Binnie JP, McCaffery FH and Campbell BK (2000) *In vitro* development of oocytes from porcine and bovine primary follicles. *Mol Cell Endocrinol* 163,117–123.
- Tilly JL, Billig H, Kowalski KI and Hsueh AJ (1992) Epidermal growth factor and basic fibroblast growth factor suppress the spontaneous onset of apoptosis in cultured rat ovarian granulosa cells and follicles by a tyrosine kinase-dependent mechanism. *Mol Endocrinol* 6,1942–1950.
- Vaskivuo TE and Tapanainen JS (2003) Apoptosis in the human ovary. *Reprod Biomed Online* 6,24–35.
- Vernon RK and Spicer LJ (1994) Effects of basic fibroblast growth factor and heparin on follicle-stimulating hormone-induced steroidogenesis by bovine granulosa cells. *J Anim Sci* 72,2696–2702.
- Visser JA and Themmen AP (2005) Anti-Mullerian hormone and folliculogenesis. *Mol Cell Endocrinol* 234,81–86.
- Vitt UA and Hsueh AJ (2001) Stage-dependent role of growth differentiation factor-9 in ovarian follicle development. *Mol Cell Endocrinol* 183,171–177.
- Vitt UA, Hayashi M, Klein C and Hsueh AJ (2000) Growth differentiation factor-9 stimulates proliferation but suppresses the follicle-stimulating hormone-induced differentiation of cultured granulosa cells from small antral and preovulatory rat follicles. *Biol Reprod* 62,370–377.
- Vlodavsky I, Brown KD and Gospodarowicz D (1978) A comparison of the binding of epidermal growth factor to cultured granulosa and luteal cells. *J Biol Chem* 253,3744–3750.
- Vogiagis D and Salamonsen LA (1999) Review: the role of leukaemia inhibitory factor in the establishment of pregnancy. *J Endocrinol* 160,181–190.
- Wandji SA, Pelletier G and Sirard MA (1992) Ontogeny and cellular localization of 125I-labeled basic fibroblast growth factor and 125I-labeled epidermal growth factor binding sites in ovaries from bovine fetuses and neonatal calves. *Biol Reprod* 47,807–813.
- Wandji SA, Srsen V, Voss AK, Eppig JJ and Fortune JE (1996) Initiation *in vitro* of growth of bovine primordial follicles. *Biol Reprod* 55,942–948.
- Wang J and Roy SK (2004) Growth differentiation factor-9 and stem cell factor promote primordial follicle formation in the hamster: modulation by follicle-stimulating hormone. *Biol Reprod* 70,577–585.
- Weenen C, Laven JS, Von Bergh AR, Cranfield M, Groome NP, Visser JA, Kramer P, Fauser BC and Themmen AP (2004) Anti-Mullerian hormone expression pattern in the human ovary: potential implications for initial and cyclic follicle recruitment. *Mol Hum Reprod* 10,77–83.
- van Wezel IL, Umaphysivam K, Tilley WD and Rodgers RJ (1995) Immunohistochemical localization of basic fibroblast growth factor in bovine ovarian follicles. *Mol Cell Endocrinol* 115,133–140.
- Winnier G, Blessing M, Labosky PA and Hogan BL (1995) Bone morphogenetic protein-4 is required for mesoderm formation and patterning in the mouse. *Genes Dev* 9,2105–2116.
- Yamamoto S, Konishi I, Nanbu K, Komatsu T, Mandai M, Kuroda H, Matsushita K and Mori T (1997) Immunohistochemical localization of basic fibroblast growth factor (bFGF) during folliculogenesis in the human ovary. *Gynecol Endocrinol* 11,223–230.
- Zachos NC, Billiar RB, Albrecht ED and Pepe GJ (2002) Developmental regulation of baboon fetal ovarian maturation by estrogen. *Biol Reprod* 67,1148–1156.
- van Zonneveld P, Scheffer GJ, Broekmans FJ, Blankenstein MA, de Jong FH, Looman CW, Habbema JD and te Velde ER (2003) Do cycle disturbances explain the age-related decline of female fertility? Cycle characteristics of women aged over 40 years compared with a reference population of young women. *Hum Reprod* 18,495–501.
- Zsebo KM, Williams DA, Geissler EN, Broudy VC, Martin FH, Atkins HL, Hsu RY, Birkett NC, Okino KH, Murdock DC *et al.* (1990) Stem cell factor is encoded at the Sl locus of the mouse and is the ligand for the c-kit tyrosine kinase receptor. *Cell* 63,213–224.

Submitted on March 10, 2005; revised on May 4, 2005; accepted on May 17, 2005
